# Supplementary material for: Long-term stable perovskite solar cells with room temperature processed metal oxide carrier transporters
Source: Royal Society of Chemistry journal article supplement (doi:10.1039/c9ta06875a), 2019-01-01
Supplement: c9ta06875a1.pdf [file c9ta06875a1.pdf]

Supplementary Information for

## Long-Term Stable Perovskite Solar Cell with Room Temperature Processed Metal Oxide Carrier Transporters

Lei Lei<sup>a,b</sup>, Songwang Yang<sup>\*a</sup>, Yu Yu<sup>b</sup>, Ming Li<sup>b</sup>, Junjie Xie<sup>a</sup>, Shanhu Bao<sup>c</sup>, Ping Jin<sup>c</sup> and Aibin Huang<sup>\*c</sup>

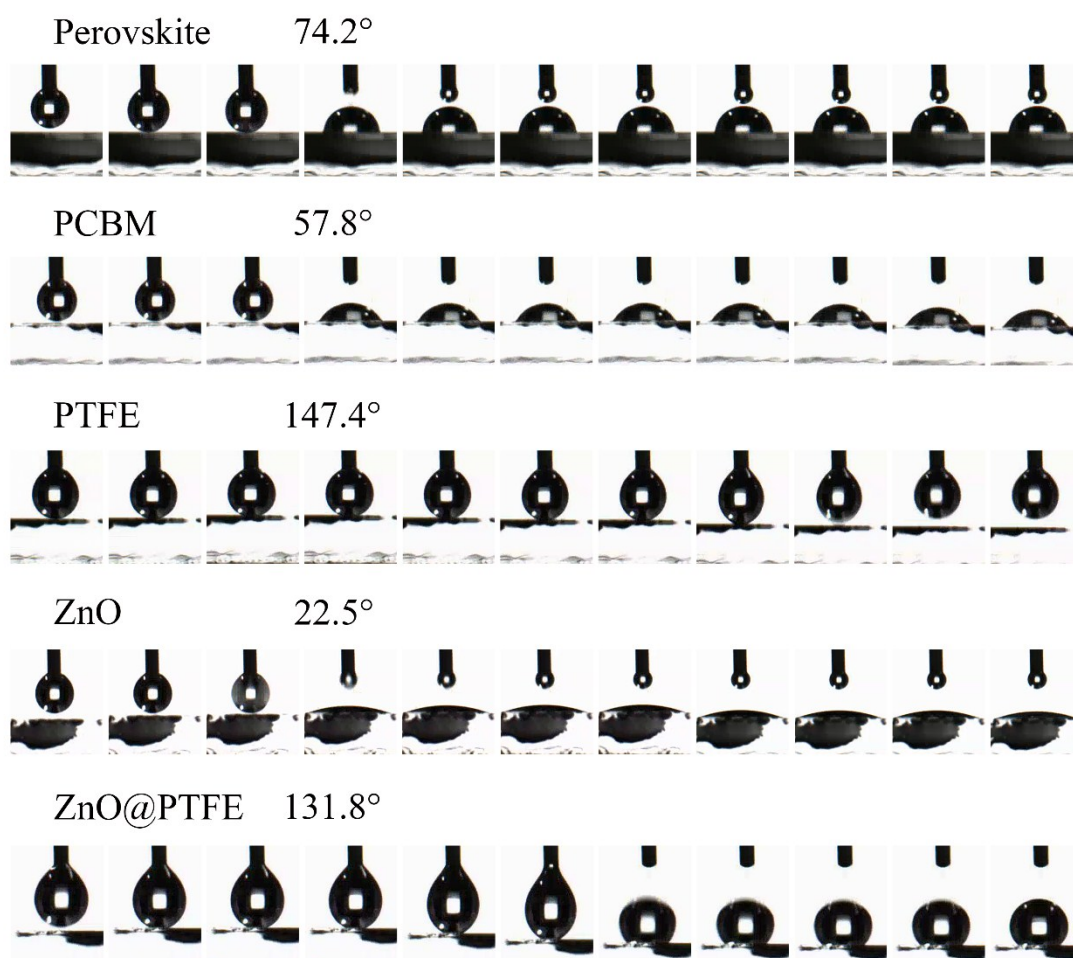

Figure S1. The wetting behaviour and water contact angles (WCAs) between water and different surfaces.

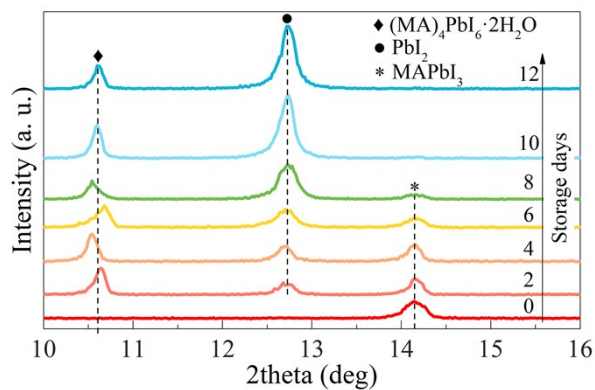

**Figure S2.** XRD patterns evolution of perovskite film stored in a chamber with constant temperature and humidity of 30 °C and 90 RH %.

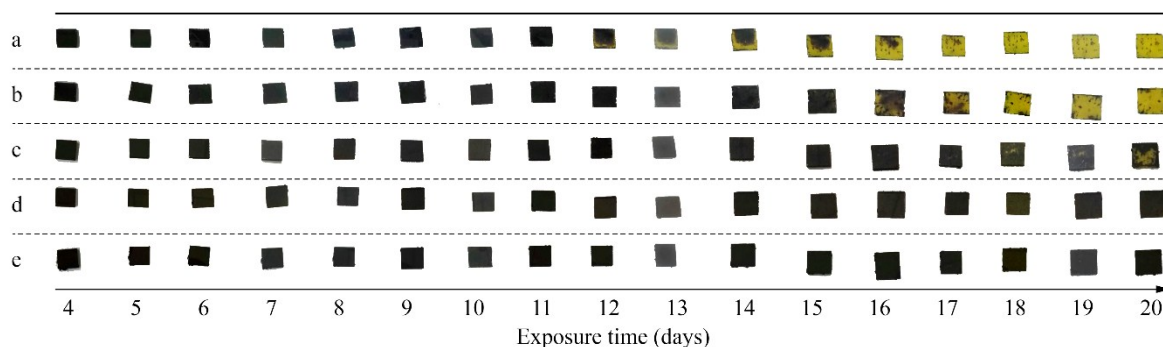

**Figure S3.** Photographs of perovskite film without coating (a) and with different coatings: (b) PCBM, (c) PTFE, (d) ZnO and (e) ZnO@PTFE after different storage times in a 30 °C and 60 RH % environment.

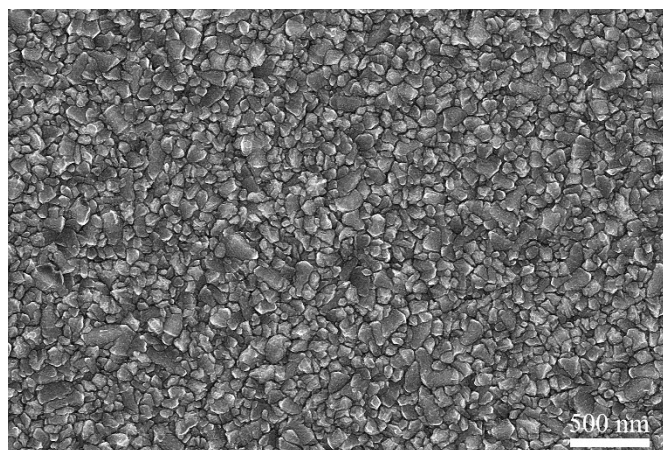

**Figure S4.** SEM image of Cu:NiO<sub>x</sub> coated FTO fabricated by direct current sputtering of Cu and Ni targets at room temperature.

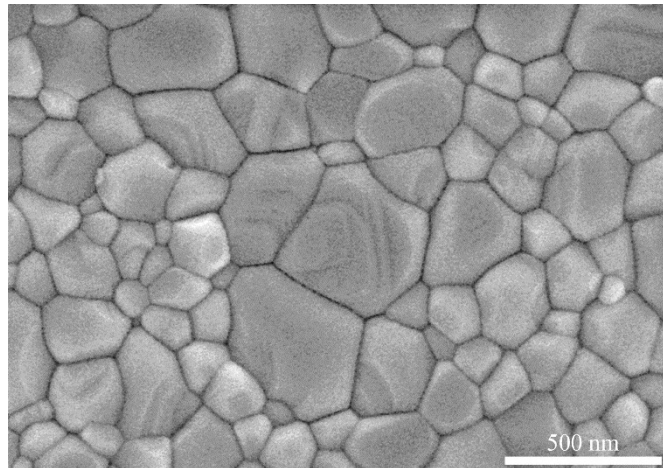

**Figure S5.** The top-view SEM image of MAPbI<sub>3</sub> on Cu:NiO<sub>x</sub>. The average grain size in view is 215.72 ± 85.25 nm.

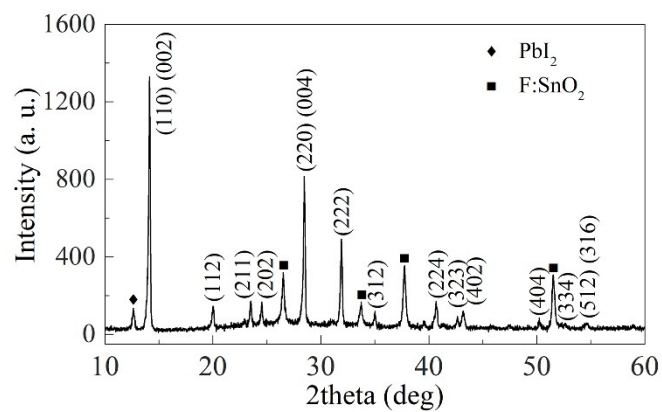

**Figure S6.** The XRD pattern of MAPbI<sub>3</sub> on Cu:NiO<sub>x</sub>. Three typical diffraction peaks centred at 14.15°, 28.48° and 31.92° were assigned to (110) (002), (220) (004) and (222) lattice planes of MAPbI<sub>3</sub>.

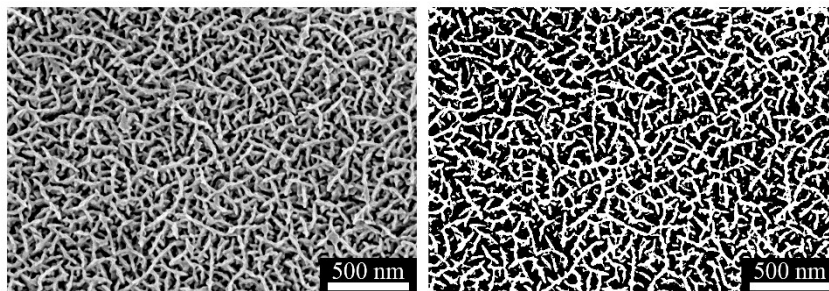

**Figure S7.** The top-view SEM image of PTFE nanowire network (left). The image on the right is obtained by applying a threshold on the original picture with ImageJ. The information below the threshold was discarded. The processed image was used to estimate the surface fraction of PTFE.



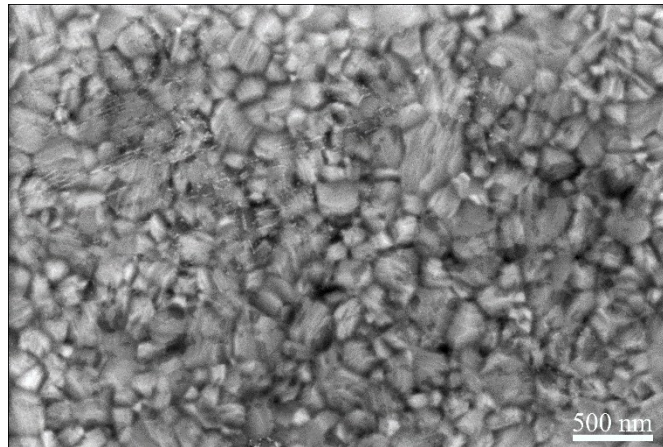

**Figure S8.** The top-view SEM image of PCBM coated perovskite film.

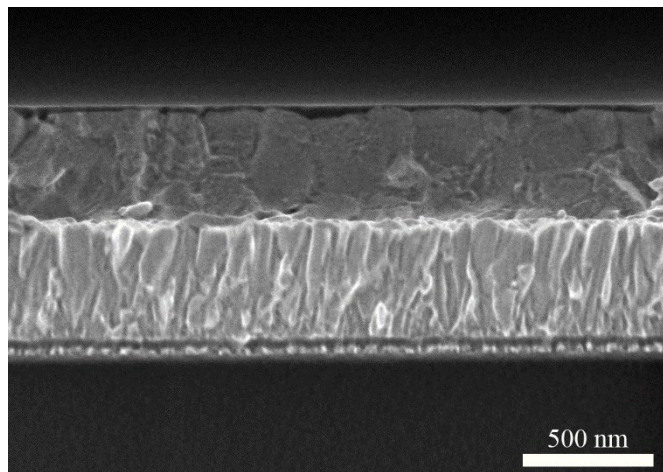

**Figure S9.** The cross-section SEM image of PCBM coated perovskite film.

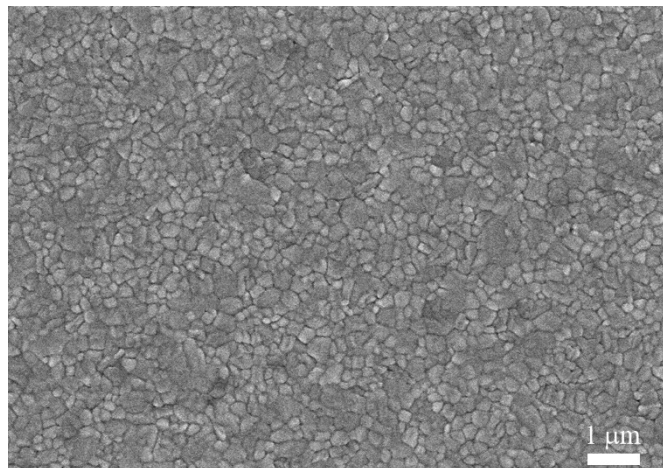

**Figure S10.** The top-view SEM image of ZnO coated perovskite film.

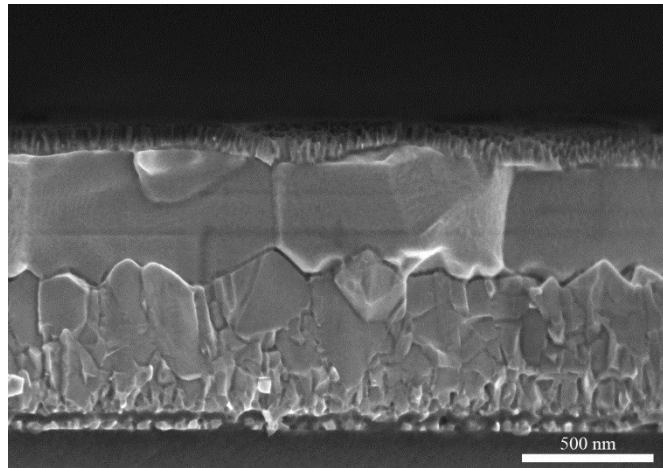

**Figure S11.** The cross-section SEM image of ZnO coated perovskite film.

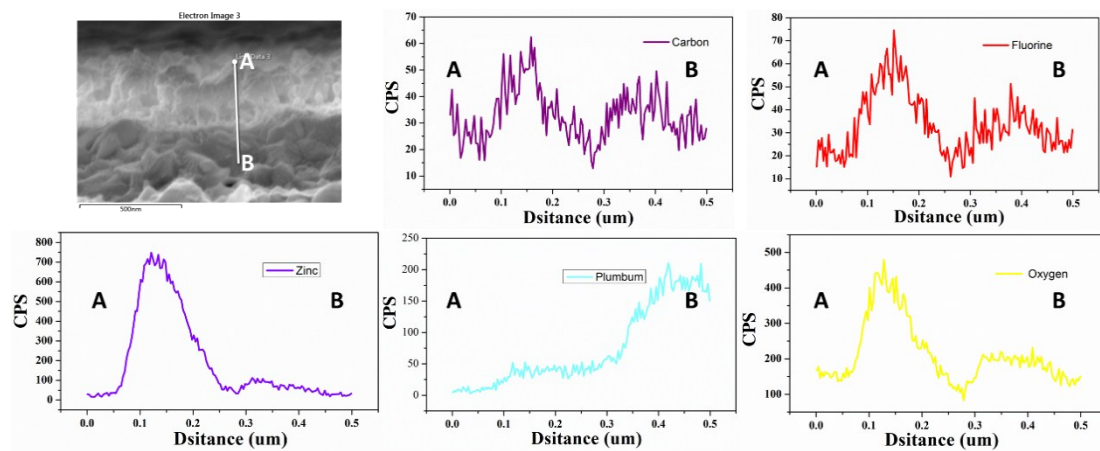

**Figure S12.** EDS line scanning patterns of elements of C, F, Zn, Pb and O along the direction marked in the cross-section SEM image of ZnO@PTFE coated perovskite film from point A to point B.

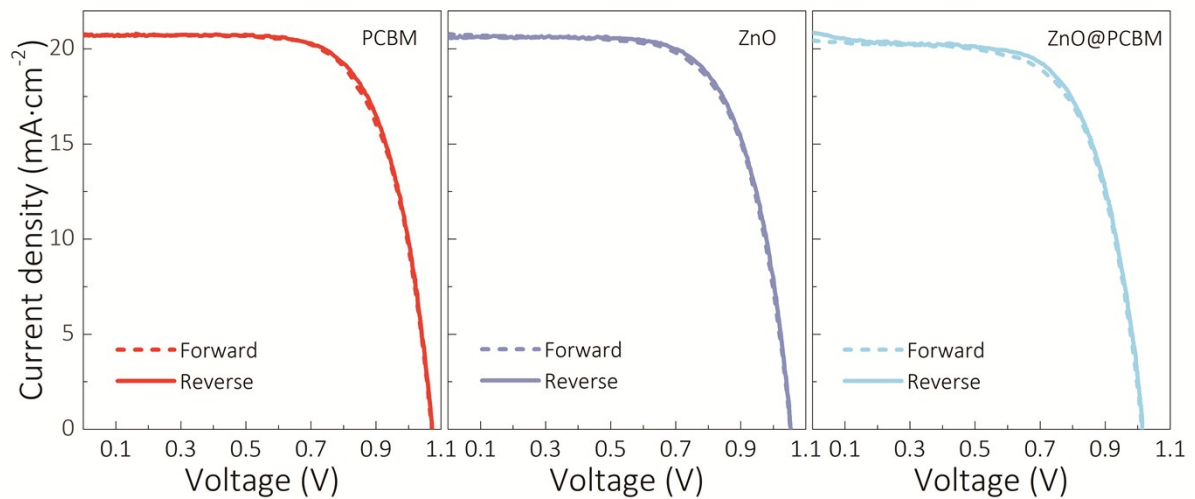

**Figure S13.** The forward (short circuit current density to open circuit voltage) and reverse (open-circuit voltage to short circuit current) scan J-V curves of PSCs with different ETMs.

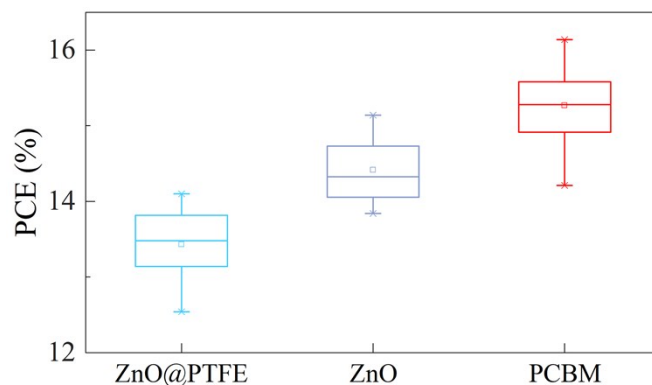

**Figure S14.** Photovoltaic performance distribution of the PSCs based on different electron transporters.

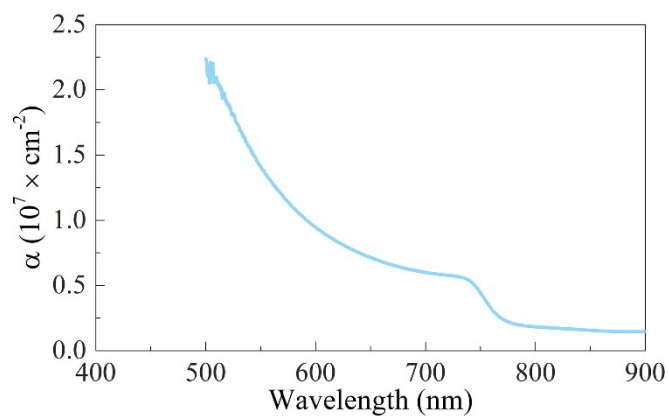

**Figure S15.** The light absorption coefficient of the perovskite film calculated from the visible-near infrared absorption spectrum.

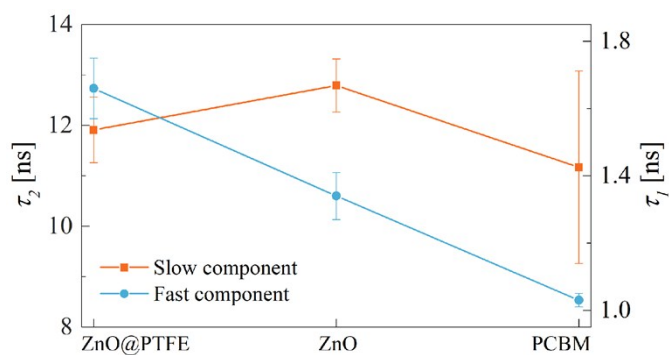

**Figure S16.** Photovoltaic performance distribution of the PSCs based on different electron transporters.

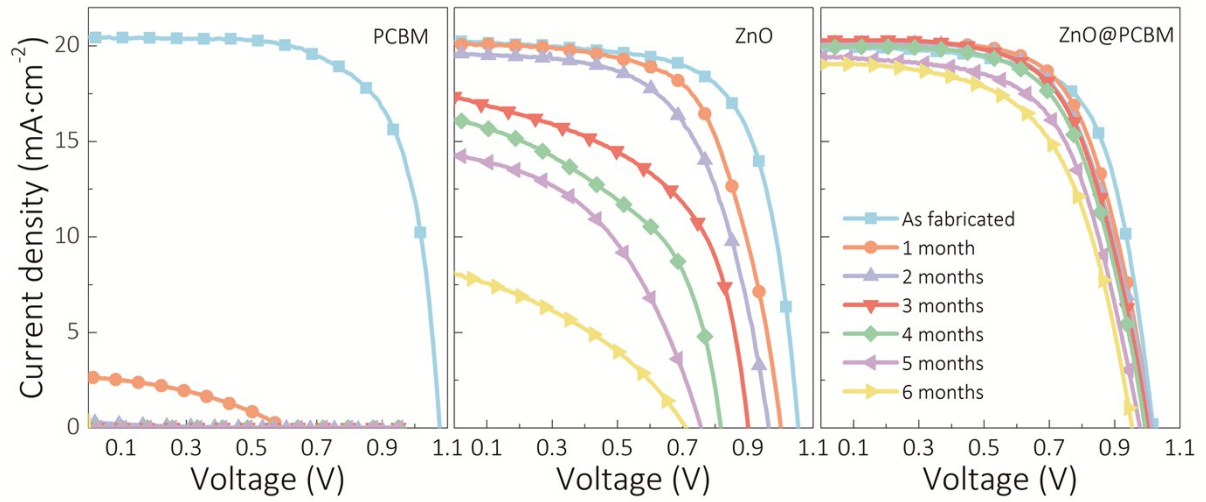

**Figure S17.** J-V curves evolution of PSCs with different electron transporter stored in ambient condition for several months.

**Table S1.** Summary of photovoltaic parameters of PSC based on PCBM stored in ambient conditions.

| Time (months)                   | 0             | 1             | 2             | 3  | 4  | 5  | 6  |
|---------------------------------|---------------|---------------|---------------|----|----|----|----|
| $J_{SC}$ (mA cm <sup>-2</sup> ) | 20.55 ± 0.06  | 2.73 ± 0.26   | 0.24 ± 0.04   | -- | -- | -- | -- |
| $V_{OC}$ (V)                    | 1.073 ± 0.004 | 0.561 ± 0.033 | 0.500 ± 0.021 | -- | -- | -- | -- |
| $FF$ (%)                        | 68.33 ± 0.56  | 35.26 ± 2.65  | 15.43 ± 1.06  | -- | -- | -- | -- |
| $PCE$ (%)                       | 15.06 ± 0.13  | 0.54 ± 0.06   | 0.02 ± 0.01   | -- | -- | -- | -- |

**Table S2.** Summary of photovoltaic parameters of PSC based on ZnO stored in ambient conditions.

| Time (months)                   | 0                | 1                | 2                | 3                | 4                | 5               | 6                |
|---------------------------------|------------------|------------------|------------------|------------------|------------------|-----------------|------------------|
| $J_{SC}$ (mA cm <sup>-2</sup> ) | 20.24 ±<br>0.07  | 20.12 ±<br>0.07  | 19.61 ±<br>0.17  | 17.36 ±<br>0.15  | 16.16 ±<br>0.14  | 14.34 ±<br>0.35 | 8.00 ±<br>0.78   |
| $V_{OC}$ (V)                    | 1.055 ±<br>0.004 | 1.000 ±<br>0.004 | 0.960 ±<br>0.008 | 0.900 ±<br>0.007 | 0.816 ±<br>0.006 | 0.754 ±<br>0.02 | 0.704 ±<br>0.018 |
| $FF$ (%)                        | 67.60 ±<br>0.31  | 63.54 ±<br>0.42  | 59.36 ±<br>0.58  | 53.27 ±<br>0.52  | 48.00 ±<br>0.89  | 44.61 ±<br>1.54 | 36.22 ±<br>2.03  |
| $PCE$ (%)                       | 14.44 ±<br>0.08  | 12.78 ±<br>0.08  | 11.17 ±<br>0.11  | 8.32 ±<br>0.09   | 6.32 ±<br>0.13   | 4.82 ±<br>0.15  | 2.03 ±<br>0.26   |

**Table S3.** Summary of photovoltaic parameters of PSC based on ZnO@PTFE stored in ambient conditions.

| Time (months)                   | 0                | 1                | 2                | 3                | 4                | 5                | 6                |
|---------------------------------|------------------|------------------|------------------|------------------|------------------|------------------|------------------|
| $J_{SC}$ (mA cm <sup>-2</sup> ) | 20.04 ±<br>0.11  | 20.07 ±<br>0.04  | 19.96 ±<br>0.21  | 20.04 ±<br>0.23  | 19.78 ±<br>0.17  | 19.27 ±<br>0.15  | 18.88 ±<br>0.15  |
| $V_{OC}$ (V)                    | 1.012 ±<br>0.005 | 1.010 ±<br>0.004 | 1.008 ±<br>0.007 | 1.002 ±<br>0.002 | 0.997 ±<br>0.004 | 0.975 ±<br>0.006 | 0.945 ±<br>0.009 |
| $FF$ (%)                        | 66.45 ±<br>0.71  | 64.45 ±<br>0.58  | 63.39 ±<br>0.74  | 62.42 ±<br>0.64  | 61.72 ±<br>0.51  | 60.50 ±<br>0.69  | 58.00 ±<br>0.35  |
| $PCE$ (%)                       | 13.48 ±<br>0.12  | 13.06 ±<br>0.12  | 12.76 ±<br>0.10  | 12.51 ±<br>0.22  | 12.17 ±<br>0.15  | 11.37 ±<br>0.05  | 10.35 ±<br>0.20  |
